# Supplementary material for: Microsatellite Analysis of Museum Specimens Reveals Historical Differences in Genetic Diversity between Declining and More Stable Bombus Species
Source: PubMed Central journal article supplement (PMC4464549; doi:10.1371/journal.pone.0127870), 2015-06-10
Supplement: pone.0127870.s001.pdf [file pone.0127870.s001.pdf]

**S1\_Table. Distribution, trend of decline and red list status of the different *Bombus* spp.**

In this table we presented, the distribution before and after 1970, trend of decline and red list status of the different *Bombus* spp. following Peeters and Reemer [1]. Species distribution is calculated as the relative areal size = (amount of hour blocks a species is found / the total amount of hour blocks checked) \* 100%, with an hour block = 5 x 5 km square. The decline in distribution or trend is calculated by Peeters and Reemer [1] as: (the relative areal size of after 1970 - relative areal size before 1970) / relative areal size before 1970 \* 100%).

| Distribution in the Netherlands      |             |            |           |            |         |                              |
|--------------------------------------|-------------|------------|-----------|------------|---------|------------------------------|
| Species                              | Before 1970 |            | 1970-2001 |            | Trend*  | Red list status<br>1970-2003 |
|                                      | Area size   | Hour block | Area size | Hour block |         |                              |
| <b><i>Widespread / stable</i></b>    |             |            |           |            |         |                              |
| <i>B. pascuorum</i>                  | 42.2%       | 373        | 31.2%     | 343        | -26.2%  |                              |
| <i>B. hortorum</i>                   | 20.3%       | 179        | 16.0%     | 176        | -21.2%  |                              |
| <i>B. pratorum</i>                   | 23.5%       | 208        | 21.6%     | 238        | -8.1%   |                              |
| <i>B. lapidarius</i>                 | 25.9%       | 229        | 16.1%     | 177        | -37.9%  |                              |
| <b><i>Widespread / declining</i></b> |             |            |           |            |         |                              |
| <i>B. ruderarius</i>                 | 16.4%       | 145        | 5.5%      | 61         | -66.2%  | vulnerable                   |
| <i>B. muscorum</i>                   | 21.0%       | 186        | 3.6%      | 40         | -82.8%  | endangered                   |
| <i>B. veteranus</i>                  | 19.9%       | 176        | 1.2%      | 13         | -94.1%  | endangered                   |
| <b><i>Restricted /declining</i></b>  |             |            |           |            |         |                              |
| <i>B. humilis</i>                    | 7.8%        | 69         | 1.9%      | 21         | -75.5%  | endangered                   |
| <i>B. sylvarum</i>                   | 5.3%        | 47         | 0.1%      | 1          | -98.3%  | critically endangered        |
| <i>B. ruderatus</i>                  | 8.7%        | 77         | 0.5%      | 6          | -93.8%  | critically endangered        |
| <i>B. subterraneus</i>               | 2.5%        | 22         | 0.0%      | 0          | -100.0% | Disappeared                  |

1. Peeters TMJ, Reemer M (2003) Bedreigde en verdwenen bijen in Nederland (Apidae S.L.): Basis rapport met voorstel voor de Rode Lijst. Stichting European Invertebrate Survey, The Netherlands. (<http://www.repository.naturalis.nl/document/46554>)
