# Supplementary material for: Microsatellite Analysis of Museum Specimens Reveals Historical Differences in Genetic Diversity between Declining and More Stable Bombus Species
Source: PubMed Central journal article supplement (PMC4464549; doi:10.1371/journal.pone.0127870), 2015-06-10
Supplement: pone.0127870.s002.pdf [file pone.0127870.s002.pdf]

**S2\_Table. Population structuring of the *B. pascuorum* populations.** Pairwise  $F_{ST}$  (with ENA correction) for the different populations of *B. pascuorum* under the diagonal and the harmonic mean of  $D_{est}$  across loci above the diagonal, a) between locations within a time period, and b) within a location between time periods. With indication of the significance level, \*\* =  $P < 0.001$  and \* =  $P < 0.005$ .

a)

| Limburg | 1918    | 1949   | 1989  |
|---------|---------|--------|-------|
| 1918    | -       | 0.017  | 0.073 |
| 1949    | 0.018   | -      | 0.079 |
| 1989    | 0.053** | 0.084* | -     |

  

| N-Holland | 1924  | 1955   | 1980  |
|-----------|-------|--------|-------|
| 1924      | -     | 0.057  | 0.045 |
| 1955      | 0.012 | -      | 0.001 |
| 1980      | 0.032 | -0.010 | -     |

  

| Overijssel | 1918  | 1990  |
|------------|-------|-------|
| 1918       | -     | 0.032 |
| 1990       | 0.045 | -     |

  

| Gelderland | 1925   | 1951  | 1975  |
|------------|--------|-------|-------|
| 1925       | -      | 0.006 | 0.030 |
| 1951       | 0.002  | -     | 0.000 |
| 1975       | -0.001 | 0.002 | -     |

b)

| 1918-1925  | N-Holland | Limburg | Overijssel | Gelderland |
|------------|-----------|---------|------------|------------|
| N-Holland  | -         | 0.088   | 0.002      | 0.018      |
| Limbur     | 0.039     | -       | 0.012      | 0.059      |
| Overijssel | 0.023     | 0.011   | -          | 0.008      |
| Gelderland | 0.013     | 0.040   | 0.032      | -          |

  

| 1944-1955  | N-Holland | Limburg | Drenthe | Gelderland |
|------------|-----------|---------|---------|------------|
| N-Holland  | -         | 0.060   | 0.022   | 0.011      |
| Limburg    | 0.036     | -       | 0.058   | 0.057      |
| Drenthe    | 0.070     | 0.050   | -       | 0.068      |
| Gelderland | 0.022     | 0.075*  | 0.033   | -          |

  

| 1975-1990  | N-Holland | Limburg | Overijssel | Gelderland |
|------------|-----------|---------|------------|------------|
| N-Holland  | -         | 0.000   | 0.001      | -0.001     |
| Limburg    | -0.009    | -       | 0.042      | 0.003      |
| Overijssel | -0.014    | 0.012   | -          | 0.014      |
| Gelderland | 0.013     | 0.001   | 0.004      | -          |
