# Supplementary material for: Microsatellite Analysis of Museum Specimens Reveals Historical Differences in Genetic Diversity between Declining and More Stable Bombus Species
Source: PubMed Central journal article supplement (PMC4464549; doi:10.1371/journal.pone.0127870), 2015-06-10
Supplement: pone.0127870.s003.pdf [file pone.0127870.s003.pdf]

**S3\_Table. Sensitivity analysis of genetic diversity.** After removal of identified sisters, we conducted a sensitivity analysis of the calculated mean expected heterozygosity ( $H_E$ ) for each population of the different *Bombus* spp. in the time period 1918-1926, based on more stringent exclusion policies for missing data. From a maximum of 5 microsatellite loci with missing values within one specimen towards only one locus with missing data. With  $n$  = the total number of workers in each exclusion step and \* = too low number of specimens.

| <i>Species</i>                | Location     | Year | <i>Maximum microsatellite loci with missing values</i> |              |              |              |              |     |
|-------------------------------|--------------|------|--------------------------------------------------------|--------------|--------------|--------------|--------------|-----|
|                               |              |      | <i>n</i>                                               | 5            | 4            | 3            | 2            | 1   |
|                               |              |      |                                                        | 161          | 159          | 154          | 139          | 112 |
| <b>Widespread / stable</b>    |              |      |                                                        |              |              |              |              |     |
| <i>B. hortorum</i>            | Gelderland   | 1918 | 0.697                                                  | 0.697        | 0.708        | 0.688        | - *          |     |
|                               | Overijssel   | 1918 | 0.763                                                  | 0.763        | 0.763        | 0.767        | 0.767        |     |
|                               | Z-Holland    | 1923 | 0.778                                                  | 0.778        | 0.765        | 0.773        | 0.703        |     |
| <i>B. lapidarius</i>          | Limburg      | 1918 | 0.553                                                  | 0.553        | 0.553        | 0.644        | 0.622        |     |
|                               | Overijssel   | 1918 | 0.710                                                  | 0.710        | 0.710        | 0.710        | 0.710        |     |
| <i>B. pratorum</i>            | Overijssel   | 1918 | 0.604                                                  | 0.604        | 0.604        | 0.613        | 0.613        |     |
| <i>B. pascuorum</i>           | Limburg      | 1918 | 0.694                                                  | 0.694        | 0.694        | 0.691        | 0.691        |     |
|                               | N-Holland    | 1924 | 0.702                                                  | 0.702        | 0.659        | 0.608        | 0.611        |     |
|                               | Overijssel   | 1918 | 0.685                                                  | 0.685        | 0.685        | 0.685        | 0.685        |     |
|                               | Gelderland   | 1925 | 0.733                                                  | 0.733        | 0.733        | 0.734        | 0.690        |     |
|                               | <b>Total</b> |      | <b>0.692</b>                                           | <b>0.692</b> | <b>0.687</b> | <b>0.691</b> | <b>0.677</b> |     |
| <b>Restricted / declining</b> |              |      |                                                        |              |              |              |              |     |
| <i>B. humilis</i>             | Gelderland   | 1926 | 0.425                                                  | 0.425        | 0.425        | 0.425        | 0.372        |     |
|                               | Limburg      | 1918 | 0.366                                                  | 0.366        | 0.366        | 0.366        | 0.299        |     |
| <i>B. ruderatus</i>           | Z-Holland    | 1923 | 0.543                                                  | 0.543        | 0.543        | 0.509        | 0.493        |     |

| <i>Species</i>                | <b>Location</b> | <b>Year</b> | <i>Maximum microsatellite loci with missing values</i> |              |              |              |              |
|-------------------------------|-----------------|-------------|--------------------------------------------------------|--------------|--------------|--------------|--------------|
|                               |                 |             | <b>5</b>                                               | <b>4</b>     | <b>3</b>     | <b>2</b>     | <b>1</b>     |
|                               | Overijssel      | 1918        | 0.669                                                  | 0.685        | 0.685        | 0.594        | 0.525        |
| <i>B. subterraneus</i>        | Overijssel      | 1925        | 0.625                                                  | 0.625        | 0.625        | 0.625        | 0.605        |
| <i>B. sylvarum</i>            | Limburg         | 1918        | 0.451                                                  | 0.451        | 0.451        | 0.470        | 0.484        |
|                               | Limburg         | 1920        | 0.458                                                  | 0.458        | 0.458        | 0.458        | 0.458        |
|                               | <b>Subtotal</b> |             | <b>0.508</b>                                           | <b>0.508</b> | <b>0.508</b> | <b>0.492</b> | <b>0.462</b> |
| <b>Widespread / declining</b> |                 |             |                                                        |              |              |              |              |
| <i>B. muscorum</i>            | Limburg         | 1918        | 0.401                                                  | 0.383        | 0.383        | 0.383        | 0.389        |
|                               | Overijssel      | 1918        | 0.503                                                  | 0.498        | 0.498        | 0.498        | 0.498        |
| <i>B. ruderarius</i>          | Limburg         | 1918        | 0.496                                                  | 0.496        | 0.496        | 0.570        | 0.570        |
|                               | N-Holland       | 1924        | 0.490                                                  | 0.490        | 0.490        | 0.496        | 0.458        |
|                               | Overijssel      | 1918        | 0.252                                                  | 0.252        | 0.252        | 0.250        | 0.289        |
| <i>B. veteranus</i>           | Limburg         | 1918        | 0.382                                                  | 0.382        | 0.382        | 0.364        | 0.364        |
|                               | <b>Subtotal</b> |             | <b>0.421</b>                                           | <b>0.417</b> | <b>0.417</b> | <b>0.430</b> | <b>0.428</b> |
|                               | <b>Total</b>    |             | <b>0.466</b>                                           | <b>0.466</b> | <b>0.466</b> | <b>0.464</b> | <b>0.446</b> |
