# Supplementary material for: Microsatellite Analysis of Museum Specimens Reveals Historical Differences in Genetic Diversity between Declining and More Stable Bombus Species
Source: PubMed Central journal article supplement (PMC4464549; doi:10.1371/journal.pone.0127870), 2015-06-10
Supplement: pone.0127870.s004.pdf [file pone.0127870.s004.pdf]

**S4\_Table. Estimation of genetic diversity after extra data exclusion steps.** Recalculations of the genetic diversity were performed after removal of three species (*B. subterraneus*, *B. ruderatus* and *B. lapidarius*) and populations with non-amplifications and based on the same 8 microsatellite loci in each species.

| <i>Species</i>                | <b>Location</b> | <b>Year</b> | <i>n</i>  | $A_R$        |              | $H_E$        |              |
|-------------------------------|-----------------|-------------|-----------|--------------|--------------|--------------|--------------|
|                               |                 |             |           | <b>Mean</b>  | <b>SE</b>    | <b>Mean</b>  | <b>SE</b>    |
| <b>Widespread / stable</b>    |                 |             |           |              |              |              |              |
| <i>B. hortorum</i>            | Gelderland      | 1918        | 8         | 5.428        | 0.845        | 0.720        | 0.081        |
|                               | Overijssel      | 1918        | 7         | 5.515        | 0.429        | 0.779        | 0.025        |
|                               | Z-Holland       | 1923        | 7         | 5.648        | 0.468        | 0.787        | 0.023        |
| <i>B. pratorum</i>            | Overijssel      | 1918        | 8         | 4.945        | 0.589        | 0.727        | 0.044        |
| <i>B. pascuorum</i>           | Limburg         | 1918        | 9         | 4.962        | 0.582        | 0.694        | 0.085        |
|                               | N-Holland       | 1924        | 9         | 4.777        | 0.692        | 0.702        | 0.072        |
|                               | Overijssel      | 1918        | 8         | 5.035        | 0.704        | 0.685        | 0.089        |
|                               | Gelderland      | 1925        | 7         | 5.250        | 0.457        | 0.733        | 0.041        |
|                               | <b>Total</b>    |             | <b>63</b> | <b>5.195</b> | <b>0.118</b> | <b>0.728</b> | <b>0.014</b> |
| <b>Restricted / declining</b> |                 |             |           |              |              |              |              |
| <i>B. humilis</i>             | Gelderland      | 1926        | 8         | 3.546        | 0.410        | 0.574        | 0.078        |
|                               | Limburg         | 1918        | 8         | 3.182        | 0.363        | 0.522        | 0.072        |
| <i>B. sylvarum</i>            | Limburg         | 1918        | 6         | 3.821        | 0.610        | 0.601        | 0.089        |
|                               | Limburg         | 1920        | 5         | 3.286        | 0.565        | 0.589        | 0.069        |
|                               | <i>Subtotal</i> |             | <b>27</b> | <b>3.459</b> | <b>0.143</b> | <b>0.572</b> | <b>0.017</b> |
| <b>Widespread / declining</b> |                 |             |           |              |              |              |              |
| <i>B. muscorum</i>            | Limburg         | 1918        | 7         | 3.603        | 0.640        | 0.516        | 0.109        |
|                               | Overijssel      | 1918        | 8         | 4.360        | 0.517        | 0.613        | 0.078        |
| <i>B. ruderarius</i>          | Limburg         | 1918        | 7         | 4.149        | 0.594        | 0.620        | 0.102        |

| <i>Species</i>      | <b>Location</b> | <b>Year</b> | <i>n</i>  | $A_R$        |              | $H_E$        |              |
|---------------------|-----------------|-------------|-----------|--------------|--------------|--------------|--------------|
|                     |                 |             |           | <b>Mean</b>  | <b>SE</b>    | <b>Mean</b>  | <b>SE</b>    |
| <i>B. veteranus</i> | N-Holland       | 1924        | 5         | 3.750        | 0.697        | 0.610        | 0.089        |
|                     | Overijssel      | 1918        | 6         | 3.663        | 0.792        | 0.566        | 0.107        |
|                     | Limburg         | 1918        | 7         | 4.153        | 0.423        | 0.619        | 0.064        |
|                     | <i>Subtotal</i> |             | <b>40</b> | <b>3.946</b> | <b>0.128</b> | <b>0.591</b> | <b>0.017</b> |
| <b>Total</b>        |                 |             | <b>67</b> | <b>3.751</b> | <b>0.144</b> | <b>0.583</b> | <b>0.014</b> |
