# Supplementary material for: Microsatellite Analysis of Museum Specimens Reveals Historical Differences in Genetic Diversity between Declining and More Stable Bombus Species
Source: PubMed Central journal article supplement (PMC4464549; doi:10.1371/journal.pone.0127870), 2015-06-10
Supplement: pone.0127870.s005.pdf [file pone.0127870.s005.pdf]

**S5\_Table. Comparison of the genetic diversity in historical and recent populations of declining and more stable bumblebee species.** The data was obtained from our study and from the available data on recent populations found in the literature. With time periods: ‘historical’ = 1895-1930; and ‘recent’ = 1975-2010’.

| <i>Bombus</i> species  | Country     | Sample size | Collection time | $H_E$ | SE    | $A_R$ | SE    | Reference    |
|------------------------|-------------|-------------|-----------------|-------|-------|-------|-------|--------------|
| <b>Declining spp.</b>  |             |             |                 |       |       |       |       |              |
| <i>B. humilis</i>      | Netherlands | 16          | 1918-1926       | 0.396 | 0.096 | 2.717 | 0.435 | This article |
| <i>B. humilis</i>      | UK          | 150         | 2005            | 0.46  | 0.07  | 4.00  | 0.34  | [22]         |
| <i>B. muscorum</i>     | Netherlands | 15          | 1918-1926       | 0.477 | 0.107 | 3.514 | 0.620 | This article |
| <i>B. muscorum</i>     | UK          | 35.5        | 2003-2005       | 0.509 | 0.013 | 4.010 | 0.060 | [21]         |
| <i>B. ruderarius</i>   | Netherlands | 19          | 1918-1926       | 0.413 | 0.106 | 2.957 | 0.600 | This article |
| <i>B. ruderatus</i>    | Netherlands | 12          | 1918-1926       | 0.606 | 0.067 | 3.808 | 0.475 | This article |
| <i>B. subterraneus</i> | Netherlands | 5           | 1918-1926       | 0.625 | 0.078 | 4.111 | 0.526 | This article |
| <i>B. sylvarum</i>     | Netherlands | 11          | 1918-1926       | 0.455 | 0.110 | 2.947 | 0.595 | This article |
| <i>B. sylvarum</i>     | France      | 18          | 2004            | 0.53  | 0.09  | 4.00  | 0.85  | [13]         |
| <i>B. sylvarum</i>     | UK          | 173         | 2003-2004       | 0.39  | 0.02  | 3.12  | 0.10  | [13]         |
| <i>B. sylvarum</i>     | UK          | 150         | 2005            | 0.52  | 0.11  | 5.57  | 1.59  | [22]         |
| <i>B. veteranus</i>    | Belgium     | 6           | 1895            | 0.607 | 0.062 | 3.470 | 0.345 | [26]         |
| <i>B. veteranus</i>    | Belgium     | 34          | 1915            | 0.577 | 0.117 | 3.680 | 0.626 | [26]         |
| <i>B. veteranus</i>    | Belgium     | 18          | 1923            | 0.578 | 0.118 | 3.710 | 0.645 | [26]         |
| <i>B. veteranus</i>    | Netherlands | 7           | 1918-1926       | 0.636 | 0.060 | 4.236 | 0.388 | This article |
| <b>Stable spp.</b>     |             |             |                 |       |       |       |       |              |
| <i>B. hortorum</i>     | Netherlands | 22          | 1918-1926       | 0.746 | 0.045 | 5.362 | 0.593 | This article |
| <i>B. hortorum</i>     | UK          | 86          | 2003-2005       | 0.89  |       | 5.70  |       | [23]         |
| <i>B. lapidarius</i>   | Netherlands | 12          | 1918-1926       | 0.632 | 0.083 | 4.302 | 0.786 | This article |
| <i>B. pascuorum</i>    | Netherlands | 33          | 1918-1926       | 0.704 | 0.036 | 5.013 | 0.292 | This article |
| <i>B. pascuorum</i>    | Netherlands | 30.5        | 1975-1995       | 0.692 | 0.036 | 5.148 | 0.344 | This article |

| <i>Bombus</i> species | Country     | Sample size | Collection time | $H_E$ | SE     | $A_R$  | SE     | Reference    |
|-----------------------|-------------|-------------|-----------------|-------|--------|--------|--------|--------------|
| <i>B. pascuorum</i>   | UK          | 32          | 2003-2004       | 0.52  | 0.11   | 7.07   | 1.24   | [13]         |
| <i>B. pratorum</i>    | Netherlands | 8           | 1918-1926       | 0.671 | 0.057  | 4.460  | 0.603  | This article |
| <i>B. terrestris</i>  | Poland      | 238         | 2008-2009       | 0.720 | 0.072* | 7.933  | 2.517* | [25]         |
| <i>B. terrestris</i>  | UK          | 24          | 1998-2000       | 0.826 | 0.019  | 5.079  | 0.700  | [27]         |
| <i>B. terrestris</i>  | Spain       | 53          | 2003            | 0.600 | 0.080* | 4.200  | 1.600* | [24]         |
| <i>B. terrestris</i>  | Germany     | 337         | 2004-2005       | 0.730 | 0.100* | 7.150  | 2.200* | [24]         |
| <i>B. jonellus</i>    | UK          | 42          | 2003-2005       | 0.755 | 0.071  | 10.020 | 1.980  | [21]         |

\* = SD used instead of SE
